# Supplementary material for: The Great American Biotic Interchange revisited: a new perspective from the stable isotope record of Argentine Pampas fossil mammals
Source: PubMed Central journal article supplement (PMC6994648; doi:10.1038/s41598-020-58575-6), 2020-01-31
Supplement: 41598_2020_58575_MOESM2_ESM.pdf [file 41598_2020_58575_MOESM2_ESM.pdf]

# Rodentia

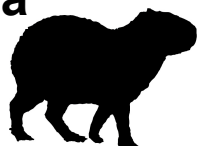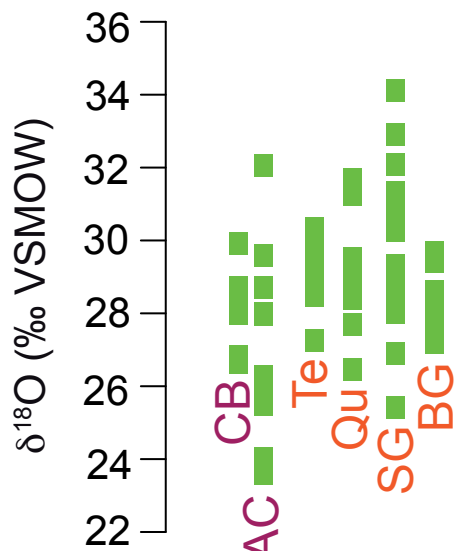

# Notoungulata

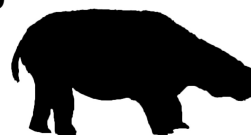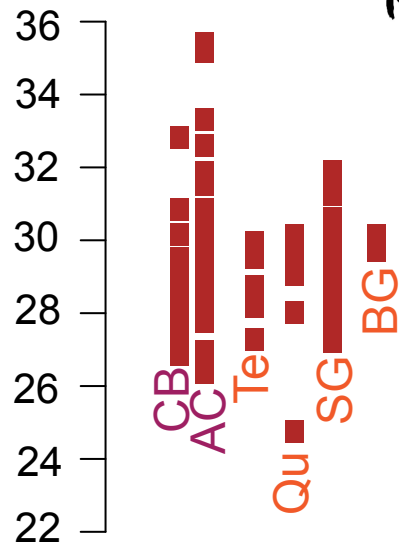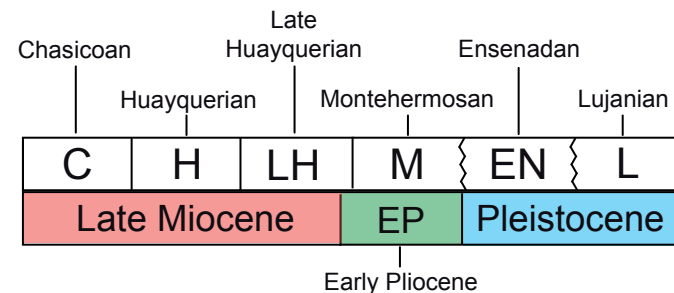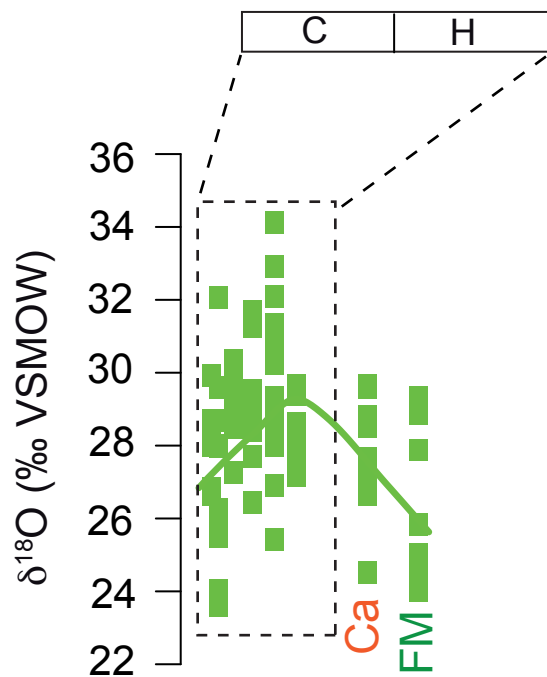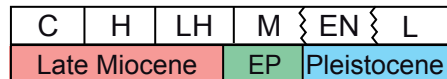

A

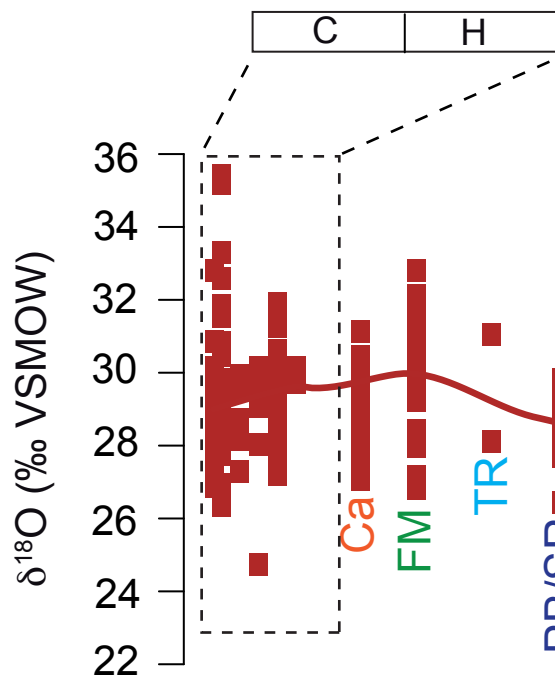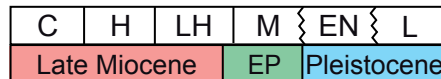

B

# Litopterna

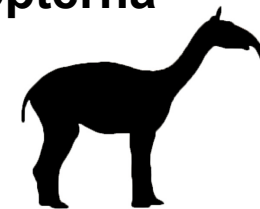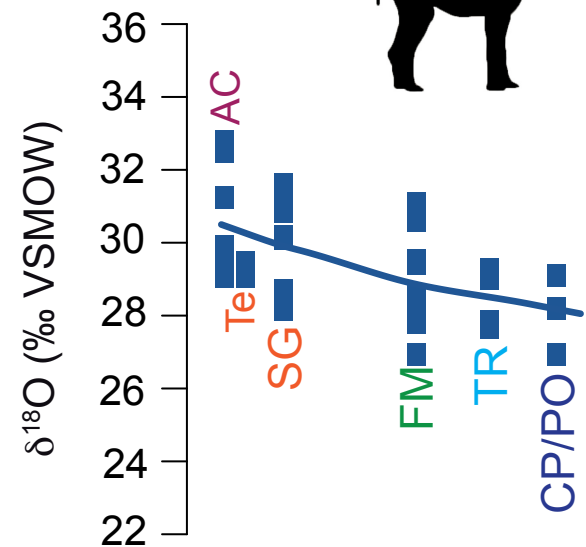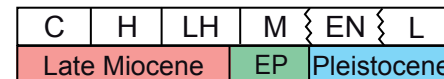

C
